# Supplementary material for: Quantitative analysis of the activation mechanism of the multicomponent growth-factor receptor Ret
Source: Springer Nature journal article supplement (doi:10.1038/nchembio823), 2006-10-01
Supplement: nchembio823-S2.pdf [file nchembio823-S2.pdf]

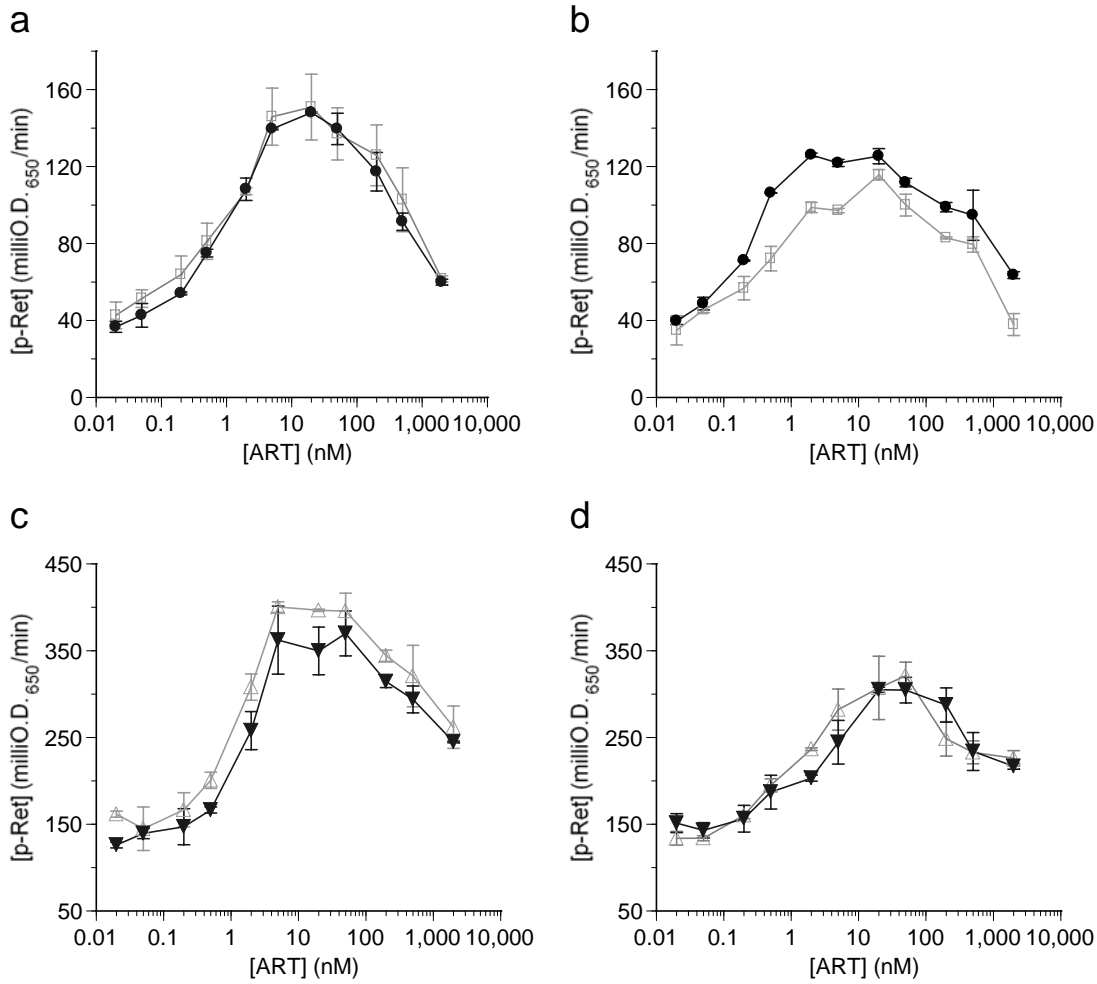

**Supplementary Figure 2.** Contribution of ligand-dependent trafficking to the shape of the ART dependent dose-response curves measured by KIRA ELISA. (a) and (b): Dose response curves measured after incubation of NB41A3-mGFR $\alpha$ 3 cells for 10 min (a) or 30 min (b) with ART in the presence (●) or absence (□) of azide. (c) and (d): Dose-response curves measured after incubation of NB41A3-mGFR $\alpha$ 3 cells for 10 min (c) or 30 min (d) with ART at 4 °C (▼) or 37 °C (△).
